# Supplementary material
Source: MDPI journal article supplement (https://www.mdpi.com/1424-2818/15/2/171)
Supplement: s1 [file s1]

Table S1. List of zooplankton taxa identified in bladderwort traps and zooplankton tow samples during the study period. Taxa were categorized as either littoral (which can also mean benthic) or pelagic based on their typical life history and ecology. Calanoida, Cyclopoida, Harpacticoida, and Nauplii were grouped together as Copepoda for analyses.

| Taxa                | Littoral or pelagic taxon | Reference example      |
|---------------------|---------------------------|------------------------|
| <i>Bosmina</i>      | Pelagic                   | Barnett et al. (2007)  |
| <i>Camptocercus</i> | Littoral                  | Adamczuk (2014)        |
| <i>Chydorus</i>     | Littoral                  | Barnett et al. (2007)  |
| Calanoida           | Pelagic                   | Barnett et al. (2007)  |
| Cyclopoida          | Pelagic                   | Barnett et al. (2007)  |
| <i>Daphnia</i>      | Pelagic                   | Barnett et al. (2007)  |
| <i>Eurycercus</i>   | Littoral                  | Lemke and Benke (2004) |
| Harpacticoida       | Littoral                  | Kurashov (1996)        |
| Hydrachnidia        | Littoral                  | Sychra et al. (2010)   |
| Nauplii             | Pelagic                   | Barnett et al. (2007)  |
| <i>Ophryoxus</i>    | Littoral                  | Fryer (1974)           |
| Ostracoda           | Littoral                  | Benzie (1989)          |
| <i>Pleuroxus</i>    | Littoral                  | Frey (1988)            |

#### References

1. Adamczuk, M. Niche separation by littoral-benthic Chydoridae (Cladocera, Crustacea) in a deep lake - potential drivers of their distribution and role in littoral-pelagic coupling. *J. Limnol.* **2014**, 73, 490–501.
2. Barnett, A.J.; Finlay, K.; Beisner, B.E. Functional diversity of crustacean zooplankton communities: towards a trait-based classification. *Freshwater Biol.* **2007**, 52, 796–813.
3. Benzie, J.A.H. The distribution and habitat preference of ostracods (Crustacea: Ostracoda) in a coastal sand-dune lake, Loch of Strathbeg, north-east Scotland. *Freshw. Biol.* **1989**, 22, 309–321.
4. Frey, D.G. Separation of *Pleuroxus laevis* Sars, 1861 from two resembling species in North America: *Pleuroxus straminius* Birge, 1879 and *Pleuroxus chiangi* n.sp. (Cladocera, Chydoridae). *Can. J. Zool.* **1988**, 66, 2534–2563.

5. Fryer, G. Evolution and adaptive radiation in the Macrothricidae (Crustacea: Cladocera): a study in comparative functional morphology and ecology. *Phil. Trans. R. Soc. Lond. B* **1974**, 269, 137–274.
6. Kurashov, E.A. Distribution and summer diapause of *Canthocamptus staphylinus* (Jurine) (Copepoda: Harpacticoida) in Lake Ladoga. *Hydrobiologia* **1996**, 320, 191–196.
7. Lemke, A.M.; Benke, A.C. Growth, reproduction, and production dynamics of a littoral microcrustacean, *Eurycercus vernalis* (Chydoridae), from a southeastern wetland, USA. *J. North Am. Benthol. Soc.* **2004**, 23, 806–823.
8. Sychra, J.; Adámek, Z.; Petřivalská, K. Distribution and diversity of littoral macroinvertebrates within extensive reed beds of a lowland pond. *Ann. Limnol.* **2010**, 46, 281–289.
